# Supplementary material for: Recombinant Vaccinia virus-coded interferon inhibitor B18R: Expression, refolding and a use in a mammalian expression system with a RNA-vector
Source: PLoS One. 2017 Dec 7;12(12):e0189308. doi: 10.1371/journal.pone.0189308 (PMC5720773; doi:10.1371/journal.pone.0189308)
Supplement: S3 File — A calibration curve produced using a standard G-CSF sample from a quantitative ELISA kit. (XLSX) [file pone.0189308.s003.xlsx]

## Sheet: Standard curve
	G-CSF standard
Num	pg/ml	OD450
8	0	0.076
7	0.69	0.081
6	2.05	0.084
5	6.17	0.099
4	18.52	0.125
3	55.56	0.203
2	166.7	0.385
1	500	1.064
